# Supplementary material for: Nitrogen fixation in two coastal upwelling regions of the Taiwan Strait
Source: PubMed Central journal article supplement (PMC5730613; doi:10.1038/s41598-017-18006-5), 2017-12-14
Supplement: 41598_2017_18006_MOESM1_ESM.pdf [file 41598_2017_18006_MOESM1_ESM.pdf]

# **Nitrogen fixation in two coastal upwelling regions of the Taiwan Strait**

Zuozhu Wen, Wenfang Lin, Rong Shen, Haizheng Hong, Shuh-Ji Kao, Dalin Shi\*

State Key Laboratory of Marine Environmental Science, Xiamen University, Xiamen,  
Fujian, 361102, P. R. China

\*Corresponding author: [dshi@xmu.edu.cn](mailto:dshi@xmu.edu.cn)

**Supplementary Table S1.** Sea surface temperature (SST, °C), sea surface salinity (SSS, psu), surface concentrations of nitrate plus nitrite (N+N,  $\mu\text{M}$ ), phosphate ( $\text{PO}_4^{3-}$ ,  $\mu\text{M}$ ) and silicate ( $\text{SiO}_3^{2-}$ ,  $\mu\text{M}$ ), calculated N:P ratio, surface  $\text{N}_2$  fixation rate (NF,  $\text{nmol N L}^{-1} \text{d}^{-1}$ ), surface primary production rate (PP,  $\mu\text{mol C L}^{-1} \text{d}^{-1}$ ), and the detection limits of NF rate ( $\text{DL}_{\text{NF}}$ ,  $\text{nmol N L}^{-1} \text{d}^{-1}$ ) in different areas of the study region. The data of NF and PP rates are mean  $\pm$  SD (n =3).

| Area               | Station | SST   | SSS   | N+N             | $\text{PO}_4^{3-}$ | $\text{SiO}_3^{2-}$ | N:P ratio          | NF <sup>c</sup> | PP              | $\text{DL}_{\text{NF}}$ |
|--------------------|---------|-------|-------|-----------------|--------------------|---------------------|--------------------|-----------------|-----------------|-------------------------|
| The southwest area | B2      | 27.65 | 33.48 | 0.68            | BD <sup>a</sup>    | 5.44                | >8.5 <sup>b</sup>  | BD <sup>a</sup> | 5.23 $\pm$ 2.25 | 1.31                    |
|                    | B4      | 29.14 | 32.18 | 1.39            | BD <sup>a</sup>    | 3.71                | >17.4 <sup>b</sup> | 1.91 $\pm$ 0.36 | 3.78 $\pm$ 0.21 | 1.08                    |
|                    | C0      | 27.22 | 33.40 | 0.25            | BD <sup>a</sup>    | 2.35                | >3.1 <sup>b</sup>  | 1.71 $\pm$ 1.08 | 1.63 $\pm$ .630 | 0.74                    |
|                    | C2      | 29.35 | 31.24 | 3.49            | BD <sup>a</sup>    | 5.25                | >43.6 <sup>b</sup> | BD <sup>a</sup> | 9.97 $\pm$ 3.54 | 1.14                    |
|                    | C4      | 30.28 | 33.53 | BD <sup>a</sup> | BD <sup>a</sup>    | 1.41                |                    | BD <sup>a</sup> | 1.26 $\pm$ 0.44 | 0.37                    |
| The northeast area | X12     | 26.28 | 33.76 | 0.34            | 0.28               | 1.22                | 1.2                | 5.17 $\pm$ 1.65 | 4.13 $\pm$ 0.31 | 1.27                    |
|                    | X15     | 28.03 | 33.52 | 0.33            | 0.19               | 3.16                | 1.7                | BD <sup>a</sup> | 1.61 $\pm$ 0.33 | 0.73                    |
|                    | X41     | 26.29 | 34.14 | 0.33            | 0.32               | 3.10                | 1.0                | 3.63 $\pm$ 1.80 | 6.55 $\pm$ 0.37 | 1.27                    |
|                    | X44     | 25.78 | 34.26 | 0.85            | 0.08               | 2.11                | 10.4               | 5.14 $\pm$ 1.83 | 2.67 $\pm$ 0.76 | 0.61                    |
|                    | Y31     | 25.41 | 34.19 | 0.40            | 0.33               | 3.08                | 1.2                | 3.38 $\pm$ 1.57 | 2.52 $\pm$ 0.03 | 1.04                    |
|                    | Y33     | 27.59 | 33.88 | 0.71            | 0.22               | 2.66                | 3.2                | 3.94 $\pm$ 1.29 | 0.54 $\pm$ 0.03 | 0.44                    |
|                    | Y41     | 25.76 | 34.17 | 0.36            | 0.28               | 2.77                | 1.3                | 7.51 $\pm$ 1.42 | 2.37 $\pm$ 0.27 | 0.84                    |
| Oligotrophic       | Y43     | 28.04 | 33.75 | 0.42            | 0.20               | 2.62                | 2.1                | 1.23 $\pm$ 0.40 | 0.80 $\pm$ 0.03 | 0.50                    |
|                    | B10     | 30.69 | 32.36 | 0.43            | BD <sup>a</sup>    | 1.66                | 5.4                | BD <sup>a</sup> | 3.19 $\pm$ 0.09 | 1.05                    |
| Others             | C10     | 29.73 | 34.06 | BD <sup>a</sup> | BD <sup>a</sup>    | 1.79                |                    | 7.13 $\pm$ 1.16 | 0.37 $\pm$ 0.04 | 0.24                    |
|                    | C6      | 30.45 | 33.72 | 0.71            | BD <sup>a</sup>    | 1.04                | >8.9 <sup>b</sup>  | 0.52 $\pm$ 0.42 | 0.52 $\pm$ 0.13 | 0.35                    |
|                    | C8      | 30.47 | 32.13 | 0.53            | BD <sup>a</sup>    | 1.71                | >6.6 <sup>b</sup>  | BD <sup>a</sup> | 3.13 $\pm$ 0.09 | 1.19                    |
|                    | B6      | 30.32 | 33.40 | 0.28            | BD <sup>a</sup>    | 1.27                | >3.5 <sup>b</sup>  | BD <sup>a</sup> | 0.70 $\pm$ 0.05 | 0.40                    |
|                    | B8      | 30.75 | 33.29 | 0.15            | BD <sup>a</sup>    | 0.84                | >1.9 <sup>b</sup>  | BD <sup>a</sup> | 0.77 $\pm$ 0.08 | 0.41                    |

a. Below detection limit.

b.  $\text{PO}_4^{3-}$  concentration was below the detection limit (0.08  $\mu\text{M}$ ), and thus the actual N:P ratio should be much higher than the calculated ones obtained using a  $\text{PO}_4^{3-}$  concentration of 0.08  $\mu\text{M}$ .

c. NF and PP rates were analyzed using SigmaPlot 12.5 (Systat Software Inc.) to test for significant differences between the NE and SW areas and between coastal waters and the oligotrophic area, respectively, using t-tests. The results showed that the differences were not statistically significant ( $p = 0.067$  and  $0.072$ , respectively).
